## CORRECTION

# Correction: Accelerating electrostatic particle-in-cell simulation: A novel FPGA-based approach for efficient plasma investigations

**Abedalruhdi Almomany, Muhammed Sutcu, Babul Salam K. S. M. Kader Ibrahim**

The affiliation for the first and second author is incorrect. Abedalruhdi Almomany is not affiliated with #2 but with #3: 3 Department of Computer Engineering, Hijjawi Faculty for Engineering Technology, Yarmouk University, Irbid, Jordan. Muhammed Sutcu is not affiliated with #3 but with #2: Department of Engineering Management, Gulf University for Science & Technology, Hawally, Kuwait.

## Reference

1. Almomany A, Sutcu M, Ibrahim BSKSMK (2024) Accelerating electrostatic particle-in-cell simulation: A novel FPGA-based approach for efficient plasma investigations. PLoS ONE 19(6): e0302578. <https://doi.org/10.1371/journal.pone.0302578> PMID: 38829861

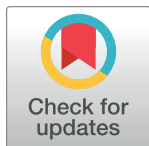

## OPEN ACCESS

**Citation:** Almomany A, Sutcu M, Ibrahim BSKSMK (2024) Correction: Accelerating electrostatic particle-in-cell simulation: A novel FPGA-based approach for efficient plasma investigations. PLoS ONE 19(12): e0316005. <https://doi.org/10.1371/journal.pone.0316005>

**Published:** December 13, 2024

**Copyright:** © 2024 Almomany et al. This is an open access article distributed under the terms of the [Creative Commons Attribution License](https://creativecommons.org/licenses/by/4.0/), which permits unrestricted use, distribution, and reproduction in any medium, provided the original author and source are credited.
